# Supplementary material for: Distinct Pigmentary and Melanocortin 1 Receptor–Dependent Components of Cutaneous Defense against Ultraviolet Radiation
Source: PLOS journal article supplement (doi:10.1371/journal.pgen.0030009), 2007-01-01
Supplement: S3 (10.1371/journal.pgen.0030009.s003) [file journal.pgen.0030009.s003]

**Table S3.** Enriched Gene Ontology (GO) Terms for Upregulated Genes in the Basal Epidermis of P2.5 *Kit<sup>W-v</sup>/Kit<sup>W-v</sup>* Mice

| GO Organizing Principle | Gene Ontology Term <sup>a</sup>         | Fold Enrichment | <i>p</i> -Value |
|-------------------------|-----------------------------------------|-----------------|-----------------|
| Biological Process      | embryogenesis and morphogenesis         | 8.28            | 5.47E-03        |
| Molecular Function      | phosphoric monoester hydrolase activity | 4.87            | 8.88E-03        |
| Molecular Function      | catalytic activity                      | 2.15            | 9.43E-03        |
| Biological Process      | morphogenesis                           | 2.19            | 1.46E-02        |
| Biological Process      | RNA processing                          | 2.84            | 1.79E-02        |
| Molecular Function      | signal transducer activity              | 2.31            | 2.10E-02        |
| Biological Process      | development                             | 2.28            | 2.32E-02        |
| Molecular Function      | cell adhesion molecule activity         | 3.61            | 2.42E-02        |
| Cellular Component      | extracellular space                     | 2.17            | 2.59E-02        |
| Molecular Function      | enzyme regulator activity               | 2.52            | 4.55E-02        |

<sup>a</sup>Enriched GO terms, that were significantly enriched ( $p \leq 0.05$ ) by  $\geq 2$ -fold, relative to all of the assayed genes on the 35K array (35328 genes), were obtained by Over-Representation Analysis using EASE software (Hosack *et al.*, 2003).
