# Supplementary material for: Distinct Pigmentary and Melanocortin 1 Receptor–Dependent Components of Cutaneous Defense against Ultraviolet Radiation
Source: PLOS journal article supplement (doi:10.1371/journal.pgen.0030009), 2007-01-01
Supplement: S4 (10.1371/journal.pgen.0030009.s004) [file journal.pgen.0030009.s004]

**Table S4. Mc1r-Dependent UVB-Responsive Genes in the Basal Epidermis of P2.5 Mice**

| Accession ID | Gene Name                                                                                      | UVB Response                                        |
|--------------|------------------------------------------------------------------------------------------------|-----------------------------------------------------|
| BG074162     | BG074162                                                                                       | Induced in <i>Mc1r<sup>e</sup>/Mc1r<sup>e</sup></i> |
| BG072062     | Cysteine and histidine-rich domain (CHORD)-containing, zinc-binding protein 1                  | Induced in <i>Mc1r<sup>e</sup>/Mc1r<sup>e</sup></i> |
| BG071813     | Topoisomerase (DNA) III alpha                                                                  | Induced in <i>Mc1r<sup>e</sup>/Mc1r<sup>e</sup></i> |
| BG071000     | IMP3, U3 small nucleolar ribonucleoprotein, homolog (yeast)                                    | Induced in <i>Mc1r<sup>e</sup>/Mc1r<sup>e</sup></i> |
| AV056089     | Asparagine-linked glycosylation 5 homolog (yeast, dolichyl-phosphate beta-glucosyltransferase) | Induced in <i>Mc1r<sup>e</sup>/Mc1r<sup>e</sup></i> |
| AI836964     | Blocked early in transport 1 homolog ( <i>S. cerevisiae</i> )-like                             | Induced in <i>Mc1r<sup>e</sup>/Mc1r<sup>e</sup></i> |
| BG073903     | Expressed sequence C78541                                                                      | Induced in <i>Mc1r<sup>e</sup>/Mc1r<sup>e</sup></i> |
| AV014799     | Regulatory solute carrier protein, family 1, member 1                                          | Induced in <i>Mc1r<sup>e</sup>/Mc1r<sup>e</sup></i> |
| AU045309     | RIKEN cDNA 2700038C09 gene                                                                     | Induced in <i>Mc1r<sup>e</sup>/Mc1r<sup>e</sup></i> |
| BG075933     | MAP kinase-activated protein kinase 2                                                          | Induced in <i>Mc1r<sup>e</sup>/Mc1r<sup>e</sup></i> |
| BG068911     | Inositol polyphosphate multikinase                                                             | Induced in <i>Mc1r<sup>e</sup>/Mc1r<sup>e</sup></i> |
| C76049       | RIKEN cDNA 2310079N02 gene                                                                     | Induced in <i>Mc1r<sup>e</sup>/Mc1r<sup>e</sup></i> |
| AA137828     | Cell division cycle 2-like 1                                                                   | Induced in <i>Mc1r<sup>e</sup>/Mc1r<sup>e</sup></i> |
| BG074549     | RAB35, member RAS oncogene family                                                              | Induced in <i>Mc1r<sup>e</sup>/Mc1r<sup>e</sup></i> |
| AI837774     | RIKEN cDNA 0610007C21 gene                                                                     | Induced in <i>Mc1r<sup>e</sup>/Mc1r<sup>e</sup></i> |
| BG073311     | F-box protein 10                                                                               | Induced in <i>Mc1r<sup>e</sup>/Mc1r<sup>e</sup></i> |
| BG069588     | MAP/microtubule affinity-regulating kinase 3                                                   | Induced in <i>Mc1r<sup>e</sup>/Mc1r<sup>e</sup></i> |
| AU042876     | Cyclin-dependent kinase 5                                                                      | Induced in <i>Mc1r<sup>e</sup>/Mc1r<sup>e</sup></i> |
| BG064747     | Glutamic pyruvic transaminase 1, soluble                                                       | Induced in <i>Mc1r<sup>e</sup>/Mc1r<sup>e</sup></i> |
| BG073940     | TGFB-induced factor 2                                                                          | Induced in <i>Mc1r<sup>e</sup>/Mc1r<sup>e</sup></i> |
| AW553290     | Protein phosphatase 3, catalytic subunit, alpha isoform                                        | Induced in <i>Mc1r<sup>e</sup>/Mc1r<sup>e</sup></i> |
| AV071031     | RIKEN cDNA 1810009O10 gene                                                                     | Induced in <i>Mc1r<sup>e</sup>/Mc1r<sup>e</sup></i> |
| BG069869     | Cleavage and polyadenylation specificity factor 3                                              | Induced in <i>Mc1r<sup>e</sup>/Mc1r<sup>e</sup></i> |
| AV013568     | Phosphofurin acidic cluster sorting protein 2                                                  | Induced in <i>Mc1r<sup>e</sup>/Mc1r<sup>e</sup></i> |
| AV084607     | RIKEN cDNA 2310007O11 gene                                                                     | Induced in <i>Mc1r<sup>e</sup>/Mc1r<sup>e</sup></i> |
| AV033582     | Protein phosphatase 1, regulatory (inhibitor) subunit 11                                       | Induced in <i>Mc1r<sup>e</sup>/Mc1r<sup>e</sup></i> |
| BG066456     | ATPase type 13A3                                                                               | Induced in <i>Mc1r<sup>e</sup>/Mc1r<sup>e</sup></i> |
| AI840560     | AI840560                                                                                       | <i>Mc1r<sup>e</sup>/Mc1r<sup>e</sup></i>            |
| BG071796     | Cadherin 22                                                                                    | <i>Mc1r<sup>e</sup>/Mc1r<sup>e</sup></i>            |
| BG070959     | RalA binding protein 1                                                                         | <i>Mc1r<sup>e</sup>/Mc1r<sup>e</sup></i>            |
| BG064900     | Stearoyl-Coenzyme A desaturase 2                                                               | <i>Mc1r<sup>e</sup>/Mc1r<sup>e</sup></i>            |

|          |                                                         |                                          |
|----------|---------------------------------------------------------|------------------------------------------|
| AV039046 | RIKEN cDNA 2810439K08 gene                              | <i>Mclr<sup>e</sup>/Mclr<sup>e</sup></i> |
| BG064919 | Interleukin enhancer binding factor 3                   | <i>Mclr<sup>e</sup>/Mclr<sup>e</sup></i> |
| AV093668 | Trinucleotide repeat containing 5                       | <i>Mclr<sup>e</sup>/Mclr<sup>e</sup></i> |
| BG069575 | RIKEN cDNA 4933433P14 gene                              | <i>Mclr<sup>e</sup>/Mclr<sup>e</sup></i> |
| AV030759 | Nucleobindin 1                                          | <i>Mclr<sup>e</sup>/Mclr<sup>e</sup></i> |
| AA060259 | Fibroblast growth factor receptor 1                     | <i>Mclr<sup>e</sup>/Mclr<sup>e</sup></i> |
| BG074722 | Lethal giant larvae homolog (Llglh), mRNA               | <i>Mclr<sup>e</sup>/Mclr<sup>e</sup></i> |
| AW550881 | Ngg1 interacting factor 3-like 1 (S. pombe)             | <i>Mclr<sup>e</sup>/Mclr<sup>e</sup></i> |
| AV085145 | Aconitase 2, mitochondrial                              | <i>Mclr<sup>e</sup>/Mclr<sup>e</sup></i> |
| AU017897 | Heterogeneous nuclear ribonucleoprotein U-like 2        | <i>Mclr<sup>e</sup>/Mclr<sup>e</sup></i> |
| AA726630 | Matrix metalloproteinase 15                             | <i>Mclr<sup>e</sup>/Mclr<sup>e</sup></i> |
| BG074412 | Eukaryotic translation initiation factor 4E             | <i>Mclr<sup>e</sup>/Mclr<sup>e</sup></i> |
| AV055176 | Block of proliferation 1                                | <i>Mclr<sup>e</sup>/Mclr<sup>e</sup></i> |
| BG064547 | Phosphoglycerate mutase family member 5                 | <i>Mclr<sup>e</sup>/Mclr<sup>e</sup></i> |
| AW538502 | AW538502                                                | Induced in +/+                           |
| BG064299 | RIKEN cDNA 2610027L16 gene                              | Induced in +/+                           |
| BG073159 | Zinc finger, DHHC domain containing 16                  | Induced in +/+                           |
| BG063675 | Coactivator-associated arginine methyltransferase 1     | Induced in +/+                           |
| AV094469 | BH3 interacting domain death agonist                    | Induced in +/+                           |
| BG064332 | Solute carrier family 38, member 4                      | Induced in +/+                           |
| BG063173 | Actinin, alpha 1                                        | Induced in +/+                           |
| BG069551 | RIKEN cDNA 2810406C15 gene                              | Induced in +/+                           |
| BG069420 | RIKEN cDNA 5430405G24 gene                              | Induced in +/+                           |
| AV093629 | Prohibitin                                              | Induced in +/+                           |
| AA119076 | RNA binding motif protein 14                            | Induced in +/+                           |
| AV141788 | Far upstream element (FUSE) binding protein 1           | Induced in +/+                           |
| AW544025 | CNDP dipeptidase 2 (metalloproteinase M20 family)       | Induced in +/+                           |
| BG063386 | Actin related protein 2/3 complex, subunit 1B           | Induced in +/+                           |
| AI837011 | Cytochrome c oxidase, subunit VIIc                      | Induced in +/+                           |
| BI076763 | Transmembrane emp24-like trafficking protein 10 (yeast) | Induced in +/+                           |
| AV058611 | TATA box binding protein-like 1                         | Induced in +/+                           |
| AV036000 | AV036000                                                | Repressed in +/+                         |
| AW552656 | AW552656                                                | Repressed in +/+                         |
| AW555131 | AW555131                                                | Repressed in +/+                         |
| BG073488 | BG073488                                                | Repressed in +/+                         |
| BG073778 | BG073778                                                | Repressed in +/+                         |
| AW549112 | AW549112                                                | Repressed in +/+                         |
| AW545825 | AW545825                                                | Repressed in +/+                         |
| AV083093 | S100 calcium binding protein A10 (calpactin)            | Repressed in +/+                         |

|          |                                                                                      |                   |
|----------|--------------------------------------------------------------------------------------|-------------------|
| AV094800 | Stromal cell derived factor receptor 1                                               | Repressed in +/+  |
| AV013645 | Mature T-cell proliferation 1                                                        | Repressed in +/+  |
| BE629868 | Brain protein 44                                                                     | Repressed in +/+  |
| BG072628 | Sex comb on midleg homolog 1                                                         | Repressed in +/+  |
| BG063228 | Kelch domain containing 4                                                            | Repressed in +/+  |
| BG075418 | FK506 binding protein 9                                                              | Repressed in +/+  |
| AV077941 | RIKEN cDNA 1700021F05 gene                                                           | Repressed in +/+  |
| AV103504 | ATPase inhibitory factor 1                                                           | Repressed in +/+  |
| BG064033 | Signal sequence receptor, gamma                                                      | Repressed in +/+  |
| AV009257 | G protein-coupled receptor 155                                                       | Repressed in +/+  |
| AA002910 | FBJ osteosarcoma oncogene                                                            | Repressed in +/+  |
| AA002910 | FBJ osteosarcoma oncogene                                                            | Repressed in +/+  |
| BG075124 | RAB12, member RAS oncogene family                                                    | Repressed in +/+  |
| BG075293 | Muscleblind-like 1 (Drosophila)                                                      | Repressed in +/+  |
| AW553641 | DCUN1D1 DCN1, defective in cullin neddylation 1, domain containing 1 (S. cerevisiae) | Repressed in +/+  |
| AV113584 | Histone 1, H2bc                                                                      | Repressed in +/+  |
| AV036603 | Placental specific protein 1                                                         | Repressed in +/+  |
| BG072724 | Transmembrane emp24 domain containing 3                                              | Repressed in +/+  |
| AV109006 | RIKEN cDNA 2510049I19 gene                                                           | Repressed in +/+  |
| AV005393 | Hemoglobin, beta adult major chain                                                   | Repressed in +/+  |
| AV106768 | Hemoglobin, beta adult major chain                                                   | Repressed in +/+  |
| AV095575 | Heat shock protein 8                                                                 | Repressed in +/+  |
| AV065227 | RIKEN cDNA 1700023B02 gene                                                           | Repressed in +/+  |
| AV094771 | Complement component 1, q subcomponent binding protein                               | Repressed in +/+  |
| BG063847 | Ribosomal protein L8                                                                 | Repressed in +/+  |
| AV037629 | Cathepsin J                                                                          | Repressed in +/+  |
| BG072802 | Ribosomal protein S16                                                                | Repressed in +/+  |
| AV107423 | Heat shock 70kD protein 5 (glucose-regulated protein)                                | Repressed in +/+  |
| BG068736 | Pyruvate dehydrogenase E1 alpha 1                                                    | Repressed in +/+  |
| AW549980 | Ubiquitin-conjugating enzyme E2N                                                     | Repressed in +/+  |
| AV032302 | RAB7, member RAS oncogene family                                                     | Repressed in +/+  |
| AU041088 | PDZ and LIM domain 1 (elfin)                                                         | Repressed in +/+  |
| BG072526 | Ribosomal protein L13                                                                | Repressed in +/+  |
| BG064712 | Growth factor receptor bound protein 2                                               | Repressed in +/+  |
| AV089802 | Adenosine deaminase                                                                  | Repressed in +/+  |
| AV048197 | Tripartite motif containing 68                                                       | Repressed in +/+  |
| BG070758 | Suppressor of Ty 4 homolog 1 (S. cerevisiae)                                         | Repressed in +/+  |
| AW554069 | AW554069                                                                             | Both <sup>a</sup> |
| AV061568 | Chromatin accessibility complex 1                                                    | Both <sup>a</sup> |

|          |                                                              |                   |
|----------|--------------------------------------------------------------|-------------------|
| BG074487 | Serine (or cysteine) peptidase inhibitor, clade B, member 6a | Both <sup>a</sup> |
| AV106770 | RIKEN cDNA 2510027J23 gene                                   | Both <sup>a</sup> |
| AV106041 | Hemoglobin, beta adult major chain                           | Both <sup>a</sup> |
| AV107375 | Hemoglobin, beta adult minor chain                           | Both <sup>a</sup> |
| BG069480 | DNA segment, Chr 19, ERATO Doi 737, expressed                | Both <sup>a</sup> |
| AA049547 | RAS-related C3 botulinum substrate 1                         | Both <sup>a</sup> |
| AV066077 | Defensin-related cryptdin 20                                 | Both <sup>a</sup> |
| BG073305 | Poliovirus receptor-related 1                                | Both <sup>a</sup> |
| BG064610 | Coiled-coil-helix-coiled-coil-helix domain containing 4      | Both <sup>a</sup> |
| BG063630 | H2A histone family, member Z                                 | Both <sup>a</sup> |
| AV003504 | RIKEN cDNA 0610030E20 gene                                   | Both <sup>a</sup> |

<sup>a</sup>UVB-responsive in both genotypes
