# Supplementary material for: Distinct Pigmentary and Melanocortin 1 Receptor–Dependent Components of Cutaneous Defense against Ultraviolet Radiation
Source: PLOS journal article supplement (doi:10.1371/journal.pgen.0030009), 2007-01-01
Supplement: S5 (10.1371/journal.pgen.0030009.s005) [file journal.pgen.0030009.s005]

**Table S5. Melanocyte-Dependent UVB-Responsive Genes in the Basal Epidermis of P2.5 Mice**

| Accession ID | Gene Name                                                         | UVB Response                                                       |
|--------------|-------------------------------------------------------------------|--------------------------------------------------------------------|
| AV093152     | AV093152                                                          | Induced in <i>Kit</i> <sup>W-v</sup> / <i>Kit</i> <sup>W-v</sup>   |
| BG073251     | RIKEN cDNA 2610005L07 gene                                        | Induced in <i>Kit</i> <sup>W-v</sup> / <i>Kit</i> <sup>W-v</sup>   |
| BG065598     | RIKEN cDNA 1110061O04 gene                                        | Induced in <i>Kit</i> <sup>W-v</sup> / <i>Kit</i> <sup>W-v</sup>   |
| AU045309     | RIKEN cDNA 2700038C09 gene                                        | Induced in <i>Kit</i> <sup>W-v</sup> / <i>Kit</i> <sup>W-v</sup>   |
| AV065229     | Acyl-Coenzyme A binding domain containing 4                       | Induced in <i>Kit</i> <sup>W-v</sup> / <i>Kit</i> <sup>W-v</sup>   |
| BG073757     | RIKEN cDNA F730014I05 gene                                        | Induced in <i>Kit</i> <sup>W-v</sup> / <i>Kit</i> <sup>W-v</sup>   |
| BG072921     | H2A histone family, member Y2                                     | Induced in <i>Kit</i> <sup>W-v</sup> / <i>Kit</i> <sup>W-v</sup>   |
| AW552541     | Cullin-associated and neddylation-dissociated 2 (putative)        | Induced in <i>Kit</i> <sup>W-v</sup> / <i>Kit</i> <sup>W-v</sup>   |
| AV078237     | Histone 2, H2aa2                                                  | Induced in <i>Kit</i> <sup>W-v</sup> / <i>Kit</i> <sup>W-v</sup>   |
| AV055389     | Membrane-associated ring finger (C3HC4) 5                         | Induced in <i>Kit</i> <sup>W-v</sup> / <i>Kit</i> <sup>W-v</sup>   |
| BG069368     | Regulatory factor X, 1 (influences HLA class II expression)       | Induced in <i>Kit</i> <sup>W-v</sup> / <i>Kit</i> <sup>W-v</sup>   |
| AV008890     | DDHD domain containing 1                                          | Repressed in <i>Kit</i> <sup>W-v</sup> / <i>Kit</i> <sup>W-v</sup> |
| AV085188     | RIKEN cDNA 2310010I16 gene                                        | Repressed in <i>Kit</i> <sup>W-v</sup> / <i>Kit</i> <sup>W-v</sup> |
| AV036826     | Protein kinase C substrate 80K-H                                  | Repressed in <i>Kit</i> <sup>W-v</sup> / <i>Kit</i> <sup>W-v</sup> |
| AV094849     | RIKEN cDNA 2410003A14 gene                                        | Repressed in <i>Kit</i> <sup>W-v</sup> / <i>Kit</i> <sup>W-v</sup> |
| AV066552     | Tubulointerstitial nephritis antigen                              | Repressed in <i>Kit</i> <sup>W-v</sup> / <i>Kit</i> <sup>W-v</sup> |
| BG070076     | Programmed cell death 8                                           | Repressed in <i>Kit</i> <sup>W-v</sup> / <i>Kit</i> <sup>W-v</sup> |
| AV014863     | Ribulose-5-phosphate-3-epimerase                                  | Repressed in <i>Kit</i> <sup>W-v</sup> / <i>Kit</i> <sup>W-v</sup> |
| AV004327     | RIKEN cDNA 0610041E09 gene                                        | Repressed in <i>Kit</i> <sup>W-v</sup> / <i>Kit</i> <sup>W-v</sup> |
| AV059999     | RER1 retention in endoplasmic reticulum 1 homolog (S. cerevisiae) | Repressed in <i>Kit</i> <sup>W-v</sup> / <i>Kit</i> <sup>W-v</sup> |
| AI840761     | Phosphatase and tensin homolog                                    | Repressed in <i>Kit</i> <sup>W-v</sup> / <i>Kit</i> <sup>W-v</sup> |
| AV036342     | Transmembrane protein 37                                          | Repressed in <i>Kit</i> <sup>W-v</sup> / <i>Kit</i> <sup>W-v</sup> |
| AV008158     | Ubiquitin associated domain containing 1                          | Repressed in <i>Kit</i> <sup>W-v</sup> / <i>Kit</i> <sup>W-v</sup> |
| BG070007     | ZNUAK family, SNF1-like kinase, 1                                 | Repressed in <i>Kit</i> <sup>W-v</sup> / <i>Kit</i> <sup>W-v</sup> |
| AV015828     | Xenotropic and polytropic murine retrovirus receptor              | Repressed in <i>Kit</i> <sup>W-v</sup> / <i>Kit</i> <sup>W-v</sup> |
| AV024030     | RIKEN cDNA 9130229H14 gene                                        | Repressed in <i>Kit</i> <sup>W-v</sup> / <i>Kit</i> <sup>W-v</sup> |
| BG067057     | Mannosidase, alpha, class 1A, member 2                            | Repressed in <i>Kit</i> <sup>W-v</sup> / <i>Kit</i> <sup>W-v</sup> |
| AV083372     | Polymerase (RNA) II (DNA directed) polypeptide D                  | Repressed in <i>Kit</i> <sup>W-v</sup> / <i>Kit</i> <sup>W-v</sup> |
| AV083947     | G protein-coupled receptor 175                                    | Repressed in <i>Kit</i> <sup>W-v</sup> / <i>Kit</i> <sup>W-v</sup> |
| AV042937     | Tubulin, alpha 3                                                  | Repressed in <i>Kit</i> <sup>W-v</sup> / <i>Kit</i> <sup>W-v</sup> |

|          |                                                                                                       |                                                                    |
|----------|-------------------------------------------------------------------------------------------------------|--------------------------------------------------------------------|
| AV113506 | Zinc finger protein 263                                                                               | Repressed in <i>Kit</i> <sup>W-v</sup> / <i>Kit</i> <sup>W-v</sup> |
| BG069611 | NudC domain containing 1                                                                              | Repressed in <i>Kit</i> <sup>W-v</sup> / <i>Kit</i> <sup>W-v</sup> |
| AV056619 | Hepatoma-derived growth factor                                                                        | Repressed in <i>Kit</i> <sup>W-v</sup> / <i>Kit</i> <sup>W-v</sup> |
| AV020098 | Leucine rich repeat containing 42                                                                     | Repressed in <i>Kit</i> <sup>W-v</sup> / <i>Kit</i> <sup>W-v</sup> |
| AV066015 | C1GALT1-specific chaperone 1                                                                          | Repressed in <i>Kit</i> <sup>W-v</sup> / <i>Kit</i> <sup>W-v</sup> |
| AV095119 | RAS-homolog enriched in brain                                                                         | Repressed in <i>Kit</i> <sup>W-v</sup> / <i>Kit</i> <sup>W-v</sup> |
| AA063914 | Tubulin, alpha 8                                                                                      | Repressed in <i>Kit</i> <sup>W-v</sup> / <i>Kit</i> <sup>W-v</sup> |
| BG072534 | Heterogeneous nuclear ribonucleoprotein A1                                                            | Repressed in <i>Kit</i> <sup>W-v</sup> / <i>Kit</i> <sup>W-v</sup> |
| AV095153 | ATP synthase, H <sup>+</sup> transporting, mitochondrial F0 complex, subunit c (subunit 9), isoform 2 | Repressed in <i>Kit</i> <sup>W-v</sup> / <i>Kit</i> <sup>W-v</sup> |
| BG065224 | Ubiquitin-conjugating enzyme E2Q (putative)                                                           | Repressed in <i>Kit</i> <sup>W-v</sup> / <i>Kit</i> <sup>W-v</sup> |
| AV085561 | Ubiquitin-conjugating enzyme E2Q (putative)                                                           | Repressed in <i>Kit</i> <sup>W-v</sup> / <i>Kit</i> <sup>W-v</sup> |
| AV007192 | MLIP1 mRNA for lipoic acid synthase                                                                   | Induced in +/+                                                     |
| AV094993 | Nucleoporin 37                                                                                        | Induced in +/+                                                     |
| BG065169 | DEAD (Asp-Glu-Ala-Asp) box polypeptide 39                                                             | Induced in +/+                                                     |
| AV081359 | Integral membrane protein 1                                                                           | Induced in +/+                                                     |
| BG074889 | RIKEN cDNA 1110038B12 gene                                                                            | Induced in +/+                                                     |
| C85855   | ASF1 anti-silencing function 1 homolog B ( <i>S. cerevisiae</i> )                                     | Induced in +/+                                                     |
| BG075903 | NADH dehydrogenase (ubiquinone) 1, subcomplex unknown, 1                                              | Induced in +/+                                                     |
| AV009166 | AV009166                                                                                              | Repressed in +/+                                                   |
| BG064785 | Cytochrome b                                                                                          | Repressed in +/+                                                   |
| AW555035 | AW555035                                                                                              | Repressed in +/+                                                   |
| BG064134 | BG064134                                                                                              | Repressed in +/+                                                   |
| BG065042 | BG065042                                                                                              | Repressed in +/+                                                   |
| BG064806 | BG064806                                                                                              | Repressed in +/+                                                   |
| BG075440 | BG075440                                                                                              | Repressed in +/+                                                   |
| AW543815 | AW543815                                                                                              | Repressed in +/+                                                   |
| BG074285 | Eukaryotic translation initiation factor 1                                                            | Repressed in +/+                                                   |
| BG072379 | Fc receptor, IgG, high affinity I                                                                     | Repressed in +/+                                                   |
| BG067009 | RIKEN cDNA 2500003M10 gene                                                                            | Repressed in +/+                                                   |
| AV082658 | Interleukin 1 alpha                                                                                   | Repressed in +/+                                                   |
| AV113681 | Nuclear receptor coactivator 6 interacting protein                                                    | Repressed in +/+                                                   |
| BG066863 | DNA segment, Chr 8, ERATO Doi 325, expressed                                                          | Repressed in +/+                                                   |
| AI838635 | Protein tyrosine phosphatase 4a2                                                                      | Repressed in +/+                                                   |
| AV107220 | Hemoglobin alpha, adult chain 1                                                                       | Repressed in +/+                                                   |
| AV007503 | AHNAK nucleoprotein (desmoyokin)                                                                      | Repressed in +/+                                                   |

|          |                                                                                  |                  |
|----------|----------------------------------------------------------------------------------|------------------|
| AV059853 | Cullin 4A                                                                        | Repressed in +/+ |
| AA050018 | Heat shock 27kDa protein 8                                                       | Repressed in +/+ |
| AI327046 | Selenoprotein P, plasma, 1                                                       | Repressed in +/+ |
| BG064042 | 3-monooxygenase/tryptophan 5-monooxygenase activation protein, gamma polypeptide | Repressed in +/+ |
| BG064043 | 3-monooxygenase/tryptophan 5-monooxygenase activation protein, gamma polypeptide | Repressed in +/+ |
| AV011032 | Procollagen, type VI, alpha 1                                                    | Repressed in +/+ |
| AW552084 | SH3-domain GRB2-like B1 (endophilin)                                             | Repressed in +/+ |
| BG074106 | Anaphase promoting complex subunit 4                                             | Repressed in +/+ |
| BG071389 | Glutamate-rich WD repeat containing 1 (Grwd1)                                    | Repressed in +/+ |
| BG075168 | Expressed sequence C78339                                                        | Repressed in +/+ |
| AV052763 | Peroxiredoxin 5                                                                  | Repressed in +/+ |
| AW552247 | Non-POU-domain-containing, octamer binding protein                               | Repressed in +/+ |
| BG069956 | V-crk sarcoma virus CT10 oncogene homolog (avian)                                | Repressed in +/+ |
| AA146115 | Serine/threonine kinase 25 (yeast)                                               | Repressed in +/+ |
| AA142750 | Adenylate cyclase 7                                                              | Repressed in +/+ |
| AV086468 | TBC1 domain family, member 20                                                    | Repressed in +/+ |
| AV048883 | Asparaginyl-tRNA synthetase                                                      | Repressed in +/+ |
| AV083160 | CD24a antigen                                                                    | Repressed in +/+ |
| AV093796 | Surfeit gene 4                                                                   | Repressed in +/+ |
| BG074976 | Ribosomal protein L8                                                             | Repressed in +/+ |
| AV162343 | Lysosomal-associated protein transmembrane 4A                                    | Repressed in +/+ |
| BG068617 | Lysosomal-associated protein transmembrane 4A                                    | Repressed in +/+ |
| AV036969 | Prothymosin alpha                                                                | Repressed in +/+ |
| BG074803 | Heat shock protein 8                                                             | Repressed in +/+ |
| BG068863 | Ecotropic viral integration site 5                                               | Repressed in +/+ |
| BG064615 | RIKEN cDNA 2310011J03 gene                                                       | Repressed in +/+ |
| AV104427 | Poly A binding protein, cytoplasmic 1                                            | Repressed in +/+ |
| AI840050 | Short coiled-coil protein                                                        | Repressed in +/+ |
| AV036624 | Glyoxalase 1                                                                     | Repressed in +/+ |
| BG064712 | Growth factor receptor bound protein 2 (Grb2)                                    | Repressed in +/+ |
| AV089802 | Adenosine deaminase                                                              | Repressed in +/+ |
| BG065782 | Cysteine-rich hydrophobic domain 1                                               | Repressed in +/+ |
| AV030593 | Elongation of very long chain fatty acids (FEN1/Elo2, SUR4/Elo3, yeast)-like 4   | Repressed in +/+ |

|          |                                                       |                   |
|----------|-------------------------------------------------------|-------------------|
| BG072989 | BG072989                                              | Both <sup>a</sup> |
| AW546889 | AW546889                                              | Both <sup>a</sup> |
| AW554432 | AW554432                                              | Both <sup>a</sup> |
| BG071729 | NACHT, leucine rich repeat and PYD containing 5       | Both <sup>a</sup> |
| BG075252 | EGL nine homolog 1 (C. elegans)                       | Both <sup>a</sup> |
| AV162211 | ERGIC and golgi 3                                     | Both <sup>a</sup> |
| AU041154 | RIKEN cDNA 1110002N22 gene                            | Both <sup>a</sup> |
| BG074377 | Hexokinase 1                                          | Both <sup>a</sup> |
| AW553730 | RIKEN cDNA 1110061O04 gene                            | Both <sup>a</sup> |
| AA038537 | Kallikrein 5                                          | Both <sup>a</sup> |
| AV083851 | Membrane-bound transcription factor peptidase, site 1 | Both <sup>a</sup> |
| AW555640 | Inner membrane protein, mitochondrial                 | Both <sup>a</sup> |
| BG063087 | RIKEN cDNA 2610204K14 gene                            | Both <sup>a</sup> |
| BG071467 | Zinc finger protein 277                               | Both <sup>a</sup> |
| BG071639 | RIKEN cDNA 1810031K17 gene                            | Both <sup>a</sup> |
| BG071637 | RIKEN cDNA 1110049F12 gene                            | Both <sup>a</sup> |
| BG074607 | Adiponectin receptor 2                                | Both <sup>a</sup> |
| AV055667 | DAZ associated protein 2                              | Both <sup>a</sup> |
| AA050220 | RIKEN cDNA 3100004P22 gene                            | Both <sup>a</sup> |
| AW551596 | Ankyrin repeat domain 11                              | Both <sup>a</sup> |
| AV105116 | Prkr interacting protein 1 (IL11 inducible)           | Both <sup>a</sup> |
| BG075394 | Nuclear receptor binding protein 2                    | Both <sup>a</sup> |
| BG075256 | Atrophin 1                                            | Both <sup>a</sup> |
| BG072540 | Cyclin D2                                             | Both <sup>a</sup> |
| BG071439 | EIG 180 mRNA for ethanol induced gene product         | Both <sup>a</sup> |
| AA064119 | Thymus cell antigen 1, theta                          | Both <sup>a</sup> |
| AW556296 | Cancer susceptibility candidate 3                     | Both <sup>a</sup> |
| BG064004 | Zinc finger protein 219                               | Both <sup>a</sup> |
| AI327441 | Cytochrome P450, family 2, subfamily j, polypeptide 6 | Both <sup>a</sup> |
| AV036341 | AV036341                                              | Both <sup>a</sup> |
| AW538230 | AW538230                                              | Both <sup>a</sup> |
| BG075783 | RIKEN cDNA 4930548G07 gene                            | Both <sup>a</sup> |

|          |                                                                     |                   |
|----------|---------------------------------------------------------------------|-------------------|
| BG069993 | Glutamic pyruvate transaminase (alanine aminotransferase) 2         | Both <sup>a</sup> |
| BG073159 | Zinc finger, DHHC domain containing 16                              | Both <sup>a</sup> |
| AV088624 | Mitochondrial ribosomal protein L16                                 | Both <sup>a</sup> |
| AV088629 | Ring finger protein 14                                              | Both <sup>a</sup> |
| AA170690 | Peroxiredoxin 4                                                     | Both <sup>a</sup> |
| BG066866 | RIKEN cDNA 1700110N18 gene                                          | Both <sup>a</sup> |
| AI840620 | Dynactin 4                                                          | Both <sup>a</sup> |
| BG064498 | Isocitrate dehydrogenase 3 (NAD+) alpha                             | Both <sup>a</sup> |
| AV060291 | Mitochondrial ribosomal protein S18A                                | Both <sup>a</sup> |
| AV003251 | Ethylmalonic encephalopathy 1                                       | Both <sup>a</sup> |
| BG063903 | DEAD (Asp-Glu-Ala-Asp) box polypeptide 17                           | Both <sup>a</sup> |
| AV057617 | Cyclin-dependent kinase 5                                           | Both <sup>a</sup> |
| BG067192 | Calcium and integrin binding 1 (calmyrin)                           | Both <sup>a</sup> |
| AV085276 | Exostoses (multiple) 1                                              | Both <sup>a</sup> |
| BG069832 | Inositol polyphosphate-5-phosphatase E                              | Both <sup>a</sup> |
| AA124630 | Platelet/endothelial cell adhesion molecule 1, transcript variant 2 | Both <sup>a</sup> |
| AV004563 | Defensin beta 29                                                    | Both <sup>a</sup> |

<sup>a</sup>UVB-responsive in both genotypes
